# Supplementary material for: Drugs Commonly Applied to Kidney Patients May Compromise Renal Tubular Uremic Toxins Excretion
Source: PubMed Central journal article supplement (PMC7354492; doi:10.3390/toxins12060391), 2020-06-12
Supplement: toxins-12-00391-s001.pdf [file toxins-12-00391-s001.pdf]

# Supplementary Materials: Drugs Commonly Applied to Kidney Patients May Compromise Renal Tubular Uremic Toxins Excretion

Silvia M. Mihaila, João P. Ferreira Faria, Maurice F.J. Stefens, Dimitrios Stamatialis, Marianne C. Verhaar, Karin G.F. Gerritsen and Rosalinde Masereeuw

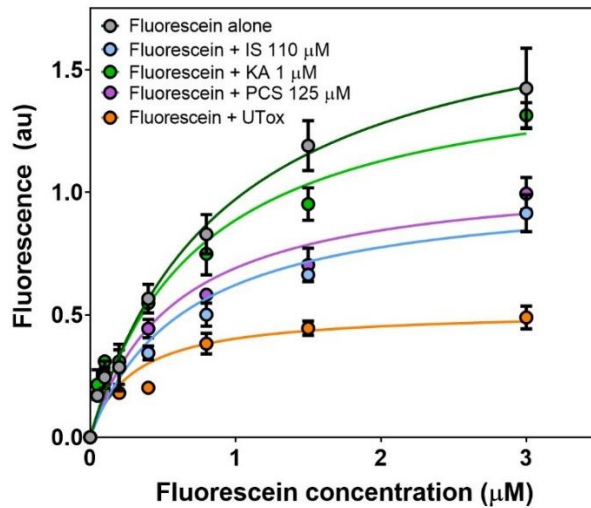

**Figure S1.** Concentration-dependent OAT1-mediated uptake of fluorescein (0–3 μM) after 10 min incubation in ciPTEC-OAT1 in the presence of selected uremic toxins. The curves ( $n = 3$ ) were fitted according to a Michaelis-Menten model.

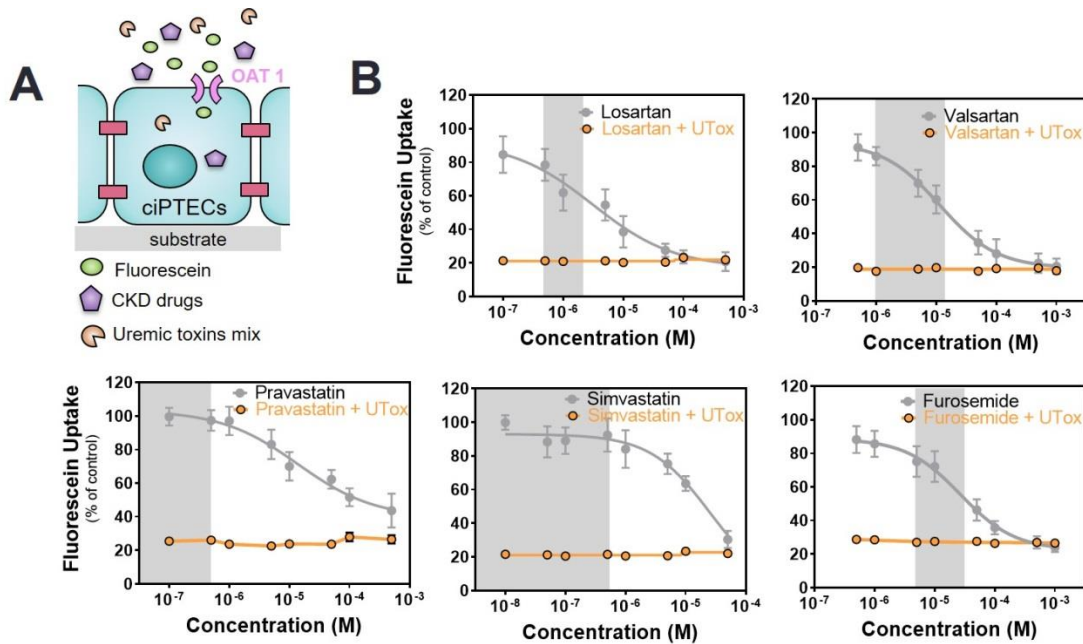

**Figure S2.** Interaction between drugs and uremic toxins mix (UTox) to inhibit OAT1-mediated fluorescein uptake. (A) Schematic representation of the co-incubation of fluorescein with variable concentrations of drugs and UTox. (B) The drug alone (grey line) shows a concentration-dependent inhibition effect. The

incubation with UTox alone results in a strong inhibitory effect, which is maintained during co-incubation with selected drugs (orange line). Grey regions indicate the therapeutic window of the respective drug.

**Table S1.** Concentrations of PBUTs used in the present study (individual and in UTox). Concentrations are adapted from EUTOX Uremic Solutes Database [42] and Jansen et al. [37].

| Compound                        | Concentration ( $\mu\text{M}$ )        |     |                                         |
|---------------------------------|----------------------------------------|-----|-----------------------------------------|
|                                 | Individual                             |     |                                         |
| Indoxyl sulfate                 |                                        | 110 |                                         |
| Kynurenic acid                  |                                        | 1   |                                         |
| p-Cresylsulfate                 |                                        | 125 |                                         |
| Uremic toxin mix (UTox)         | Uremic concentration ( $\mu\text{M}$ ) |     | IC <sub>50</sub> ( $\mu\text{M}$ ) [37] |
| Indoxyl sulfate                 | 173.5 $\pm$ 121.9                      | 100 | 25 $\pm$ 4                              |
| Indoxyl- $\beta$ -D-glucuronide | 9.4 $\pm$ 9.4                          | 10  | 492 $\pm$ 68                            |
| Indole-3-acetic acid            | 11.4 $\pm$ 2.3                         | 10  | 19 $\pm$ 2                              |
| Kynurenic acid                  | 0.8 $\pm$ 0.4                          | 1   | 6 $\pm$ 1                               |
| L-Kynurenine                    | 3.3 $\pm$ 0.9                          | 5   | 65 $\pm$ 8                              |
| Hippuric acid                   | 608.4 $\pm$ 362.8                      | 300 | 5 $\pm$ 1                               |
| p-Cresylglucuronide             | 30.1 $\pm$ 6.7                         | 40  | 2650 $\pm$ 922                          |
| p-Cresylsulfate                 | 122.2 $\pm$ 90.3                       | 125 | 79 $\pm$ 14                             |

**Table S2.** Michaelis-Menten parameters for concentration-dependent OAT1-mediated fluorescein (FL) uptake in ciPTEC-OAT1 in the presence of selected uremic toxins.

| Compound  | Compound Concentration ( $\mu\text{M}$ ) | K <sub>m</sub> ( $\mu\text{M}$ ) | V <sub>max</sub> (au) | R square |
|-----------|------------------------------------------|----------------------------------|-----------------------|----------|
| FL alone  | 0–3                                      | 0.93 $\pm$ 0.09                  | 1.87 $\pm$ 0.07       | 0.971    |
| FL + IS   | 110                                      | 0.66 $\pm$ 0.10                  | 1.03 $\pm$ 0.06       | 0.907    |
| FL + KA   | 1                                        | 0.75 $\pm$ 0.08                  | 1.55 $\pm$ 0.67       | 0.954    |
| FL + pCS  | 125                                      | 0.57 $\pm$ 0.07                  | 1.09 $\pm$ 0.49       | 0.938    |
| FL + UTox | mix                                      | 0.29 $\pm$ 0.03                  | 0.52 $\pm$ 0.03       | 0.852    |

Abbreviations: FL = fluorescein; IS = indoxyl sulfate; KA = kynurenic acid; PCS = p-cresylsulfate, UTox = uremic toxin mix.

**Table S3.** Panel of selected drugs tested for their inhibitory effect over the fluorescein OAT1-mediated uptake in cPTEC-OAT1: characteristics and range of concentrations used within the study.

| Drug         | Molecular Weight (g/mol) | Catalog Number (Sigma) | Stock Concentration | Solvent | Range of Concentrations |
|--------------|--------------------------|------------------------|---------------------|---------|-------------------------|
| ACEIs        |                          |                        |                     |         |                         |
| Captopril    | 217                      | C4042                  | 100 mM              | MilliQ  | 500 nM– mM              |
| Enalaprilate | 384                      | E9658                  | 10 mM               | MilliQ  | 500 nM–1 mM             |
| Lisinopril   | 441                      | L0702000               | 50 mM               | MilliQ  | 100 nM–500 $\mu$ M      |
| ARBs         |                          |                        |                     |         |                         |
| Valsartan    | 435                      | SML0142                | 10 mM               | DMSO    | 50 nM–1 mM              |
| Losartan     | 422                      | Y0001062               | 50 mM               | DMSO    | 100 nM–500 $\mu$ M      |
| Statins      |                          |                        |                     |         |                         |
| Simvastatin  | 418                      | S6196                  | 5 mM                | DMSO    | 10 nM–50 $\mu$ M        |
| Pravastatin  | 446                      | P4498                  | 50 mM               | MilliQ  | 100 nM–500 $\mu$ M      |
| Diuretics    |                          |                        |                     |         |                         |
| Furosemide   | 330                      | F4381                  | 100 mM              | DMSO    | 500 nM–1 mM             |
| H2RA         |                          |                        |                     |         |                         |
| Cimetidine   | 252                      | C4522                  | 150 mM              | MilliQ  | 500 nM–1 mM             |

Abbreviations: ACEIs = angiotensin-converting enzyme inhibitors; ARBs = angiotensin receptor blockers; H2RA = histamine H<sub>2</sub> receptor antagonists.

**Table S4.** Overview of the percentage (%) reduction of fluorescein uptake in the presence of UTox and drugs (at the lowest concentration).

| Toxin | Percentage (%) Fluorescein Uptake at the Lowest Drug Concentration |                |                |                |                |                |
|-------|--------------------------------------------------------------------|----------------|----------------|----------------|----------------|----------------|
|       | No Drug                                                            | ARBs           |                | Statins        |                | Diuretics      |
|       | Reference                                                          | Losartan       | Valsartan      | Pravastatin    | Simvastatin    | Furosemide     |
| UTox  | 34.4 $\pm$ 8.3                                                     | 23.5 $\pm$ 3.5 | 24.7 $\pm$ 4.5 | 27.8 $\pm$ 2.6 | 25.7 $\pm$ 2.9 | 28.7 $\pm$ 3.2 |

Abbreviations: UTox = uremic toxin mix; ARBs = angiotensin receptor blockers.

**Table S5.** Physicochemical determinants of human renal clearance of tested drugs.

| Drug         | Total CL (mL/min/kg) [78] | Renal CL (mL/min/kg) [78] | Renal Clearance (% of Total CL) | Protein Binding (%) ( <a href="http://www.drugbank.ca">www.drugbank.ca</a> ) | T <sub>1/2</sub> (h) [44] |
|--------------|---------------------------|---------------------------|---------------------------------|------------------------------------------------------------------------------|---------------------------|
| ACEIs        |                           |                           |                                 |                                                                              |                           |
| Captopril    | 12                        | 12                        | 100                             | 25–30                                                                        | 1–2                       |
| Enalaprilate | 1.6                       | 1.6                       | 100                             | 50                                                                           | 8–11                      |
| Lisinopril   | 1.2                       | 1.2                       | 100                             | negligible                                                                   | 12                        |
| ARBs         |                           |                           |                                 |                                                                              |                           |
| Losartan     | 8.2                       | 0.9                       | 11                              | 99                                                                           | 1.5–2                     |
| Valsartan    | 0.49                      | 0.14                      | 29                              | 94–97                                                                        | 6–9                       |
| Diuretics    |                           |                           |                                 |                                                                              |                           |
| Furosemide   | 2.4                       | 1.7                       | 71                              | 95–99                                                                        | 1–3                       |
| Statins      |                           |                           |                                 |                                                                              |                           |
| Pravastatin  | 14                        | 6.3                       | 45                              | 60                                                                           | 1–2.5 [45]                |
| Simvastatin  | –                         | –                         | 13                              | 95                                                                           | 2                         |
| H2RA         |                           |                           |                                 |                                                                              |                           |
| Cimetidine   | 8.1                       | 7.9                       | 97                              | 20                                                                           | 1.5–4                     |

Abbreviations: CL = clearance; ARBs = angiotensin receptor blockers; H2RA = histamine H<sub>2</sub> receptor antagonists, T<sub>1/2</sub>= pharmacologic half life

**Table S6.** Overview of the lowest drug concentrations at which a statistically significant decrease ( $p < 0.05$ ) of the percentage (%) of fluorescein uptake was observed.

| PBUTs | Drug Concentration ( $\mu\text{M}$ ) |          |           |             |             |            |
|-------|--------------------------------------|----------|-----------|-------------|-------------|------------|
|       | No Drug                              | ARBs     |           | Statins     |             | Diuretics  |
|       | % FL Uptake<br>Reference Values      | Losartan | Valsartan | Pravastatin | Simvastatin | Furosemide |
| IS    | 44.0 $\pm$ 5.4                       | 1 *      | 5 *       | 5           | 5           | 50         |
| KA    | 88.2 $\pm$ 8.5                       | 5        | 10 *      | 5           | 10          | 5 *        |
| PCS   | 46.7 $\pm$ 4.5                       | 1 *      | 1 *       | 1 *         | 1 *         | 5 *        |

\* indicates concentrations that fall in the therapeutic concentration range. Abbreviations: FL = fluorescein; PBUTs = protein-bound uremic toxins; IS = indoxyl sulfate; KA = kynurenic acid; PCS = p-cresylsulfate; ARBs = angiotensin receptor blockers.
